# Supplementary material for: (Pro)renin receptor promotes colorectal cancer through the Wnt/beta-catenin signalling pathway despite constitutive pathway component mutations
Source: PubMed Central journal article supplement (PMC6342928; doi:10.1038/s41416-018-0350-0), 2018-12-17
Supplement: 41416_2018_350_MOESM2_ESM.pdf [file 41416_2018_350_MOESM2_ESM.pdf]

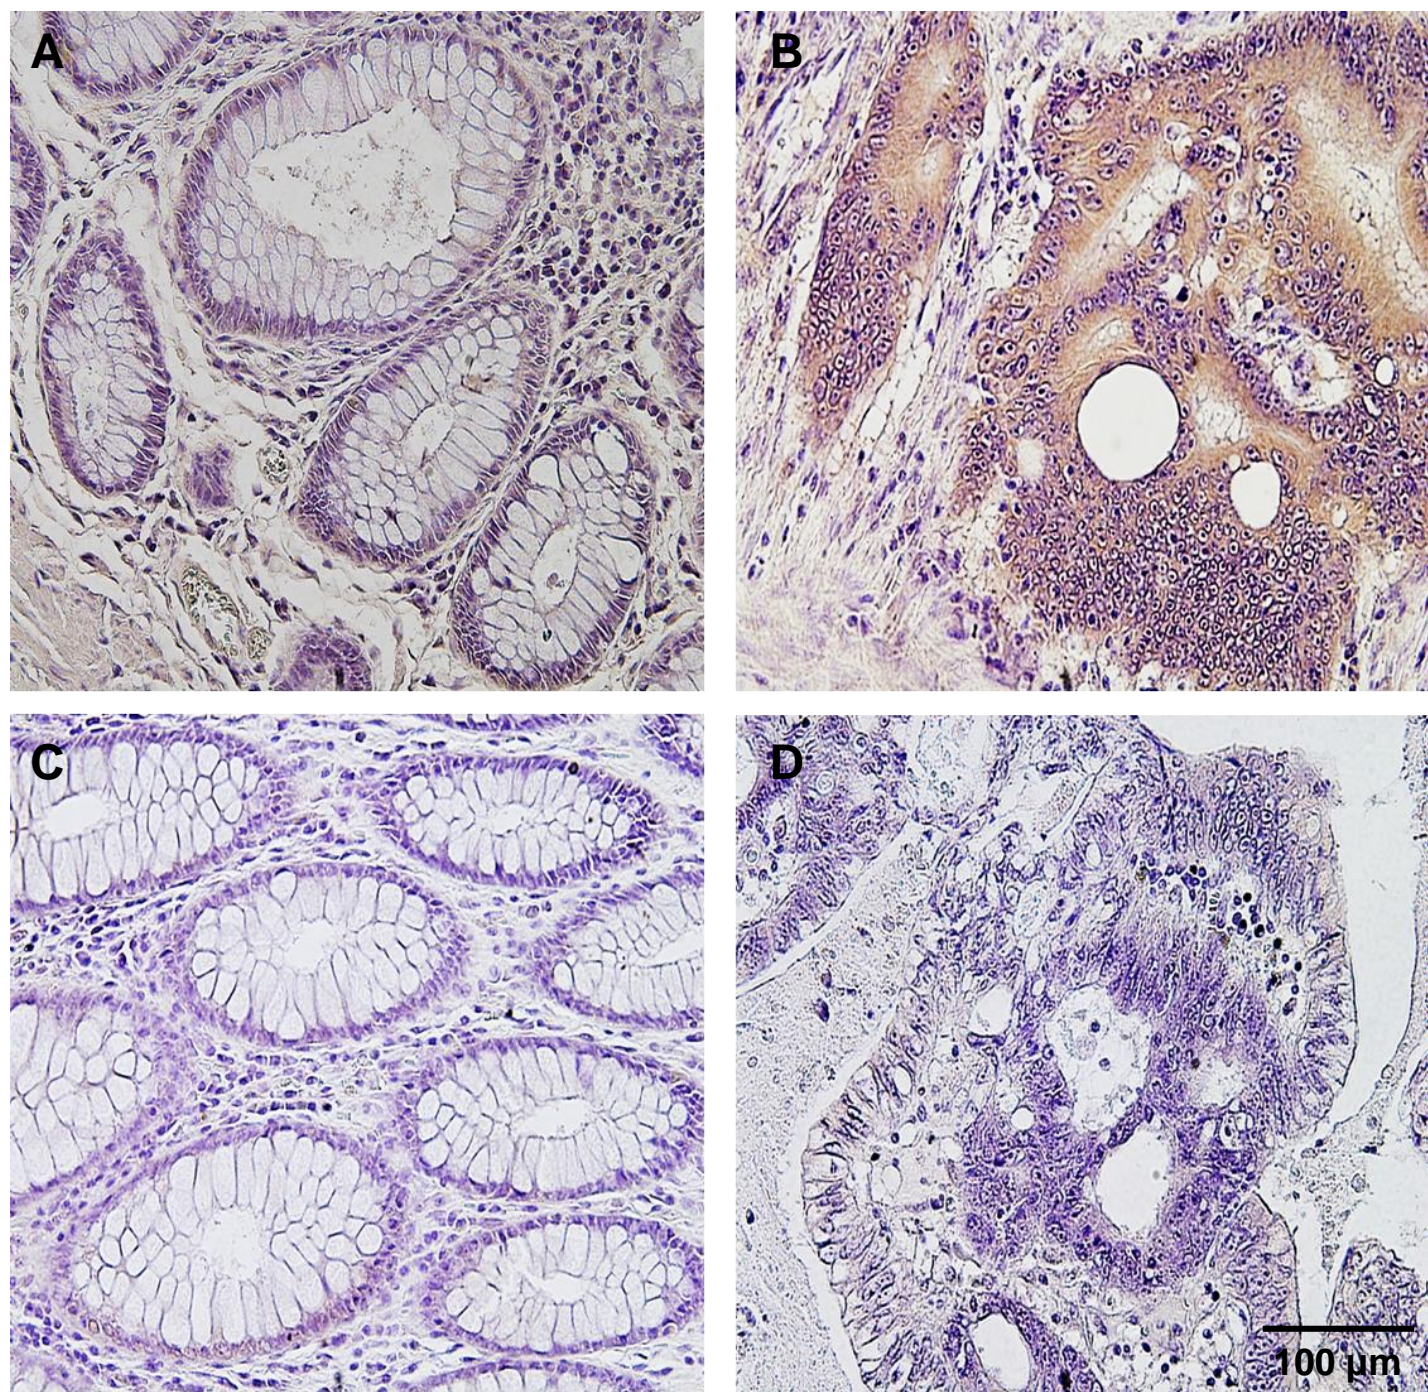

**Supplementary Figure S1.** Confirmation of the specificity of immunohistochemistry staining with (P)RR antibody in human colorectal tissues. (A and B) Staining with (P)RR antibody in normal (A) and cancer (B) regions. (C and D) As the negative control, almost no obvious staining with rabbit serum, from which (P)RR antibody was isolated, was seen in normal (C) and cancer (D) regions.

**A****IP: Wnt3 antibody****IP: rabbit IgG**Scrambled  
siRNA(P)RR  
siRNAScrambled  
siRNA(P)RR  
siRNA**IB: Wnt3**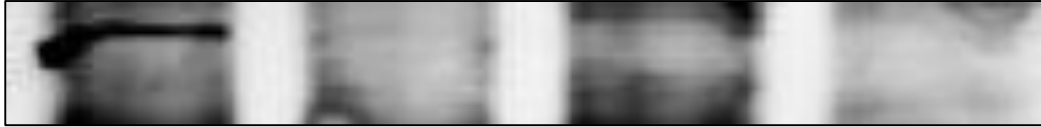

37 kD

**B****IP**

Lysates

rabbit IgG

Wnt3 antibody

**IB: (P)RR**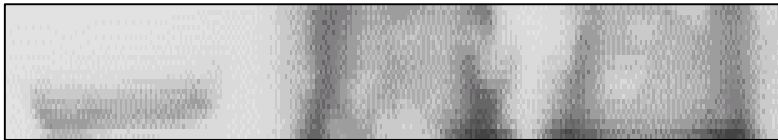

37 kD

**IB: Wnt3**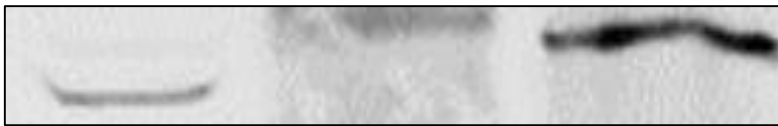

37 kD

**Supplementary Figure S2.** (P)RR affects Wnt3 protein level without direct binding interaction. **(A)** Decreased Wnt3 protein level in DLD-1 cells after (P)RR silencing was confirmed through immunoprecipitation. **(B)** (P)RR did not directly bind with Wnt3. (P)RR was undetectable in the Wnt3 immunocomplex. Whole cell lysate served as positive control. Rabbit IgG served as negative control. IP: immunoprecipitation; IB: immunoblotting.

**A**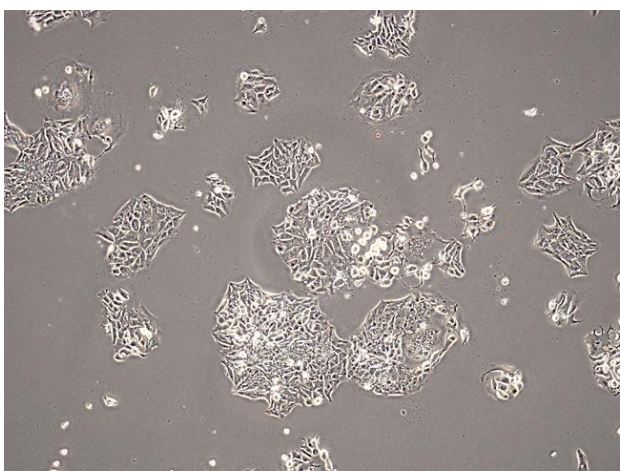

|                 |             |
|-----------------|-------------|
| Vehicle         |             |
| Scrambled siRNA | (P)RR siRNA |

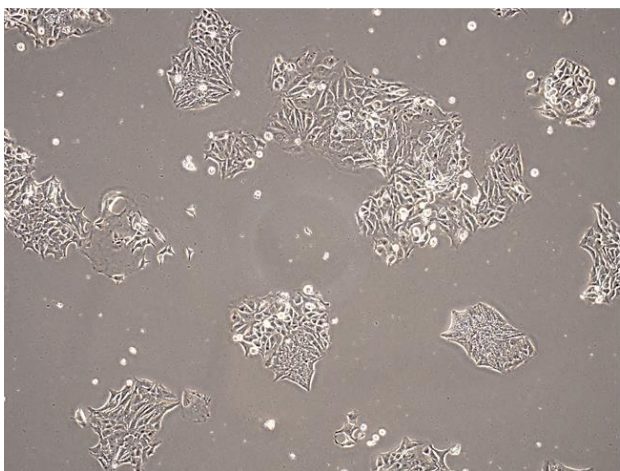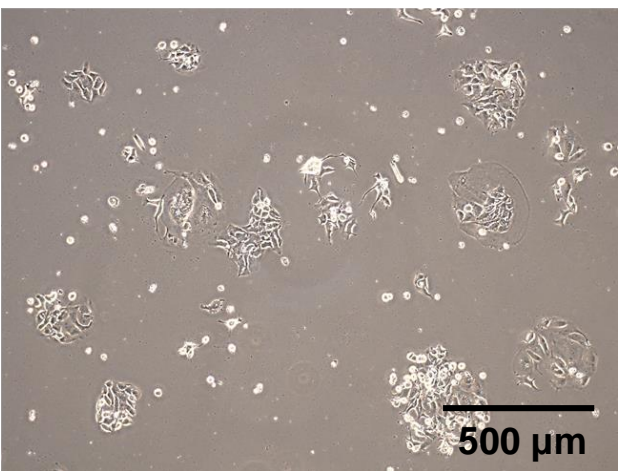**B**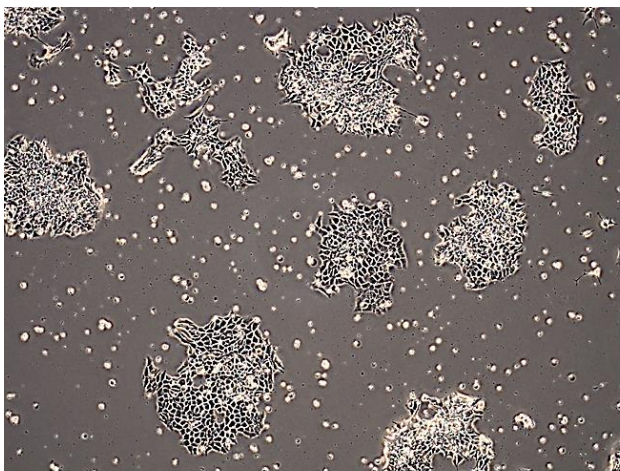

|                 |             |
|-----------------|-------------|
| Vehicle         |             |
| Scrambled siRNA | (P)RR siRNA |

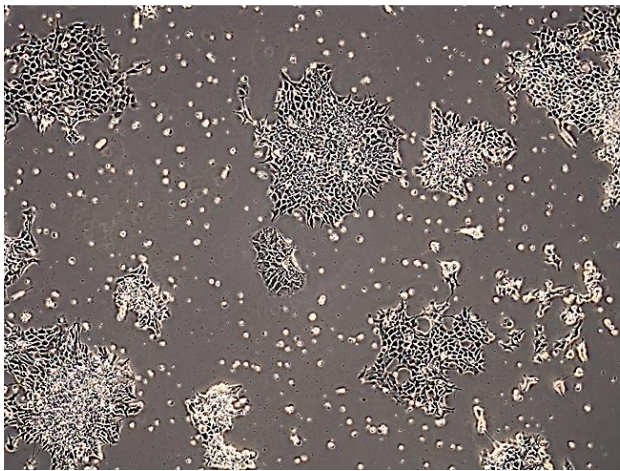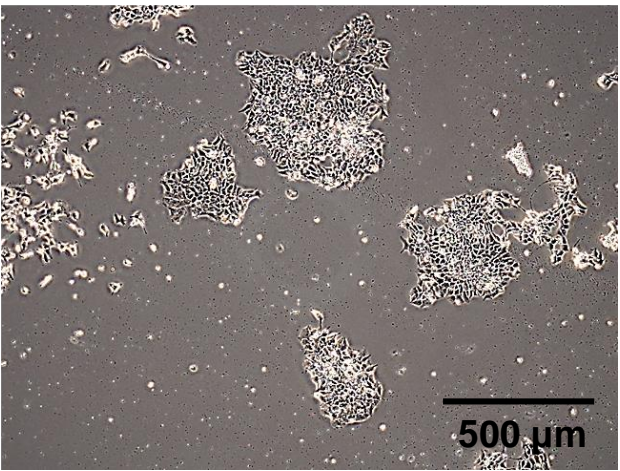

**Supplementary Figure S3.** (P)RR silencing attenuates colony formation of colorectal cancer cells. (**A** and **B**) Equal number of DLD-1 (**A**) and HCT116 (**B**) cells were initially seeded into each group. Then, cells were respectively transfected with scrambled siRNA or (P)RR siRNA, or without any treatment (vehicle), followed by the observation of colony formation after 72 h. In comparison with vehicle and scrambled siRNA groups, colony formation of both cell lines was obviously attenuated by (P)RR silencing.

**A**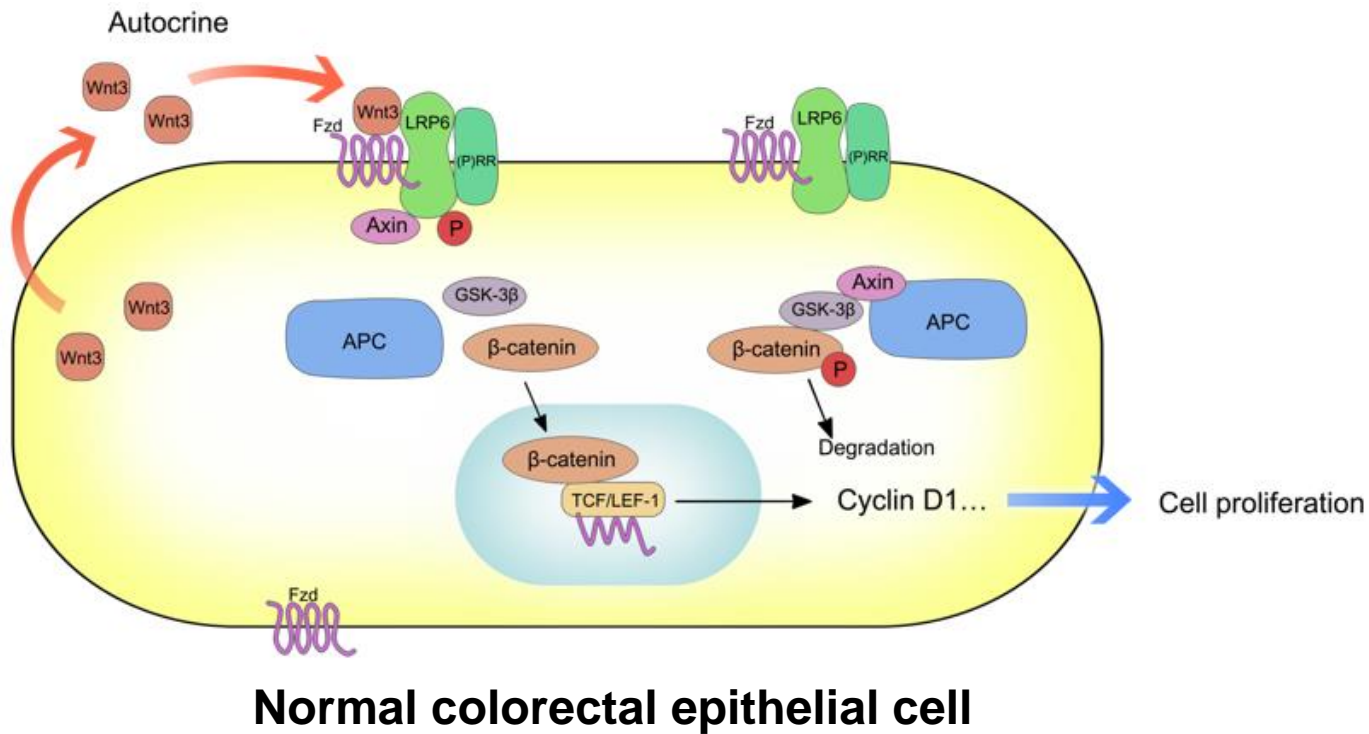**B**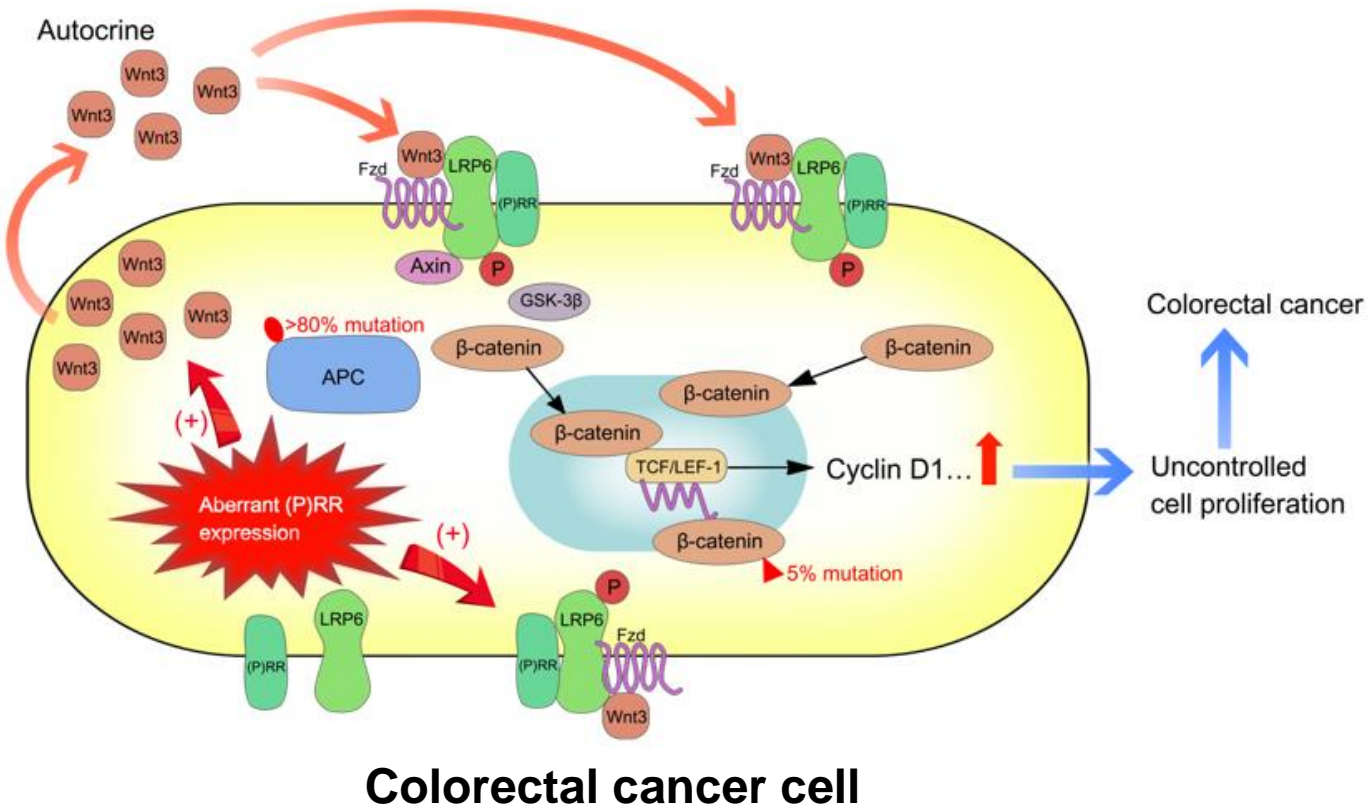

**Supplementary Figure S4.** Schematic diagram summarizing the roles of (P)RR in promoting colorectal cancer through the Wnt/ $\beta$ -catenin signaling pathway. **(A)** In normal colorectal epithelial cells, the binding of endogenously secreted Wnt3 to its ‘membrane receptor complex’ keeps Wnt/ $\beta$ -catenin signaling at a normal level and thus plays a role in cell proliferation. **(B)** In colorectal cancer cells, by increasing endogenous Wnt3 and LRP6 protein levels, aberrant (P)RR expression excessively activates Wnt/ $\beta$ -catenin signaling and further promotes the disease, despite constitutive pathway activating mutations.
